# Supplementary material for: Inhibition of G protein-gated K+ channels by tertiapin-Q rescues sinus node dysfunction and atrioventricular conduction in mouse models of primary bradycardia
Source: PubMed Central journal article supplement (PMC7300035; doi:10.1038/s41598-020-66673-8), 2020-06-17
Supplement: 41598_2020_66673_MOESM1_ESM.pdf [file 41598_2020_66673_MOESM1_ESM.pdf]

**Title:** Inhibition of G protein-gated  $K^+$  channels by tertiapin-Q rescues sinus node dysfunction and atrioventricular conduction in mouse models of primary bradycardia

**Running title:** Pharmacological inhibition of  $I_{KACb}$  rescued sinus node dysfunction

Isabelle Bidaud<sup>1,2\*</sup>, Antony Chung You Chong<sup>1,2\*</sup>, Agnes Carcouet<sup>3</sup>, Stephan De Waard<sup>2,3</sup>, Flavien Charpentier<sup>3,4</sup>, Michel Ronjat<sup>2,3</sup>, Michel De Waard<sup>2,3</sup>, Dirk Isbrandt<sup>5,6</sup>, Kevin Wickman<sup>7</sup>, Anne Vincent<sup>1,2</sup>, Matteo E. Mangoni<sup>1,2</sup>, @Pietro Mesirca<sup>1,2</sup>

<sup>1</sup>IGF, Univ. Montpellier, CNRS, INSERM, Montpellier, France.

<sup>2</sup>LabEx Ion Channels Science and Therapeutics (ICST).

<sup>3</sup>l'institut du thorax, INSERM, CNRS, UNIV Nantes, F-44007 Nantes, France.

<sup>4</sup>l'institut du thorax, CHU Nantes, Nantes, France

<sup>5</sup>Institute for Molecular and Behavioural Neuroscience, University of Cologne, 50937 Cologne, Germany.

<sup>6</sup>Experimental Neurophysiology, German Centre for Neurodegenerative Diseases (DZNE), 53175 Bonn, Germany.

<sup>7</sup>Department of Pharmacology, University of Minnesota, Minneapolis, USA.

\* These authors contributed equally to this work

@ author for correspondence

Pietro Mesirca, PhD  
Institut de Génomique Fonctionnelle  
CNRS UMR 5203, Inserm U 1191  
Université de Montpellier  
141, rue de la Cardonille  
34094 Montpellier, France  
Phone +33 (0)4 34 35 92 46  
Fax +33 (0)4 67 54 24 32  
Email: Pietro.Mesirca@igf.cnrs.fr

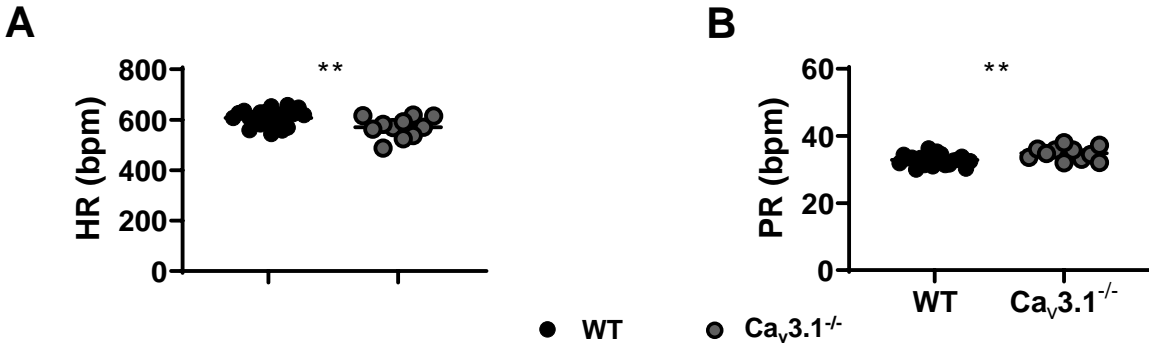

**Supplementary figure 1. Heart rate and atrioventricular conduction time in  $Ca_v3.1^{-/-}$  mice in basal condition.** 24h heart rate (A) and PR Interval (B) recorded in WT (black circle, n=22) and  $Ca_v3.1^{-/-}$  mice (gray circle, n=11). Statistics: unpaired t test. \*\* $p < 0.01$ . Error bars define the s.e.m.

## SUPPL FIGURE 1

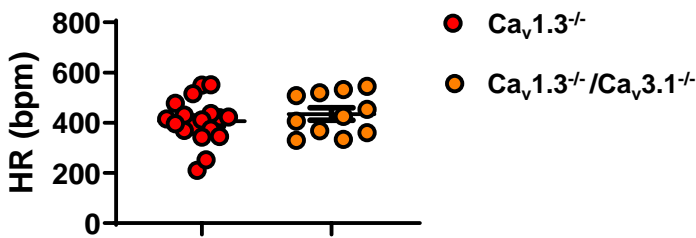

**Supplementary figure 2. Heart rate in  $Ca_v3.1^{-/-}$  and  $Ca_v1.3^{-/-}/Ca_v3.1^{-/-}$  mice in basal condition.** Heart rate recorded in  $Ca_v1.3^{-/-}$  (red circle, n=18) and  $Ca_v1.3^{-/-}/Ca_v3.1^{-/-}$  (orange circle, n=11). Statistics: unpaired t test. Error bars define the s.e.m.

## SUPPL FIGURE 2

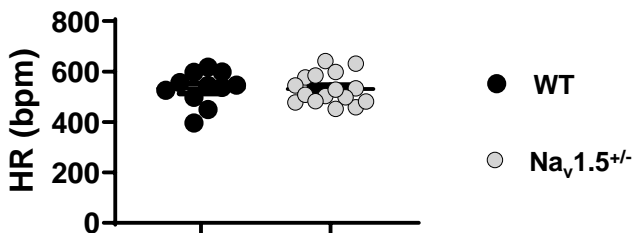

**Supplementary figure 3. Heart rate  $Na_v1.5^{+/-}$  animals in basal condition.** 24h heart rate recorded in WT (black circle, n=11) and  $Na_v1.5^{+/-}$  mice (gray circle, n=16). Statistics: unpaired t test. Error bars define the s.e.m.

## SUPPL FIGURE 3

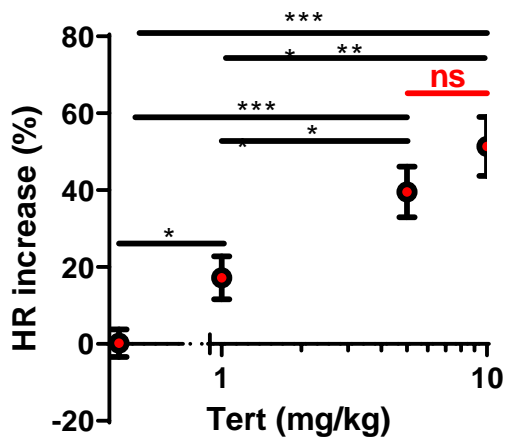

**Supplementary figure 4. Dose response curve of heart rate in response to tertiapin-Q in  $Ca_v1.3^{+/-}$  animals.** Percentage of heart rate increasing in mutant  $Ca_v1.3^{+/-}$  animals after injection of different doses of tertiapin-Q (n=11 at 0 mg/kg, n=11 at 1mg/kg, n=8 at 5mg/kg and n=6 at 10mg/kg); Statistics: analysis of variance (ANOVA) followed by Holm-Sidak multiple comparisons test. \*p < 0.05, \*\*p < 0.01, \*\*\*\*p < 0.0001. Error bars define the s.e.m.

## SUPPL FIGURE 4

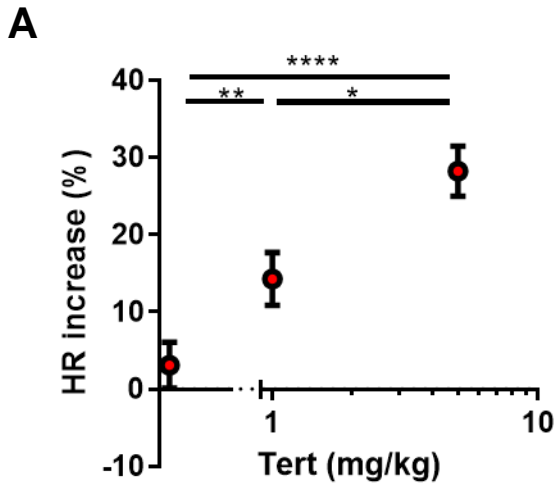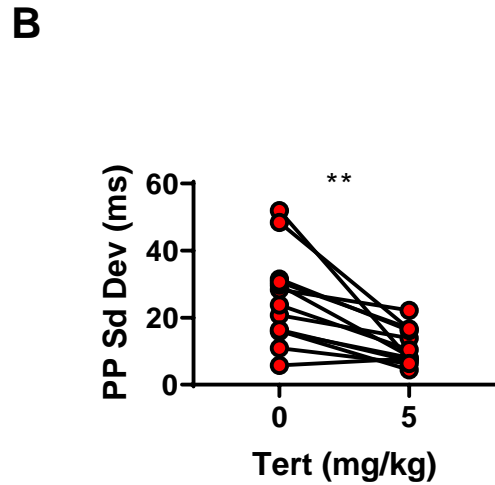

**Supplementary figure 5. A.** percentage of increase in the heart rate in response to injection of different doses of tertiapin-Q (n=19 at 0 mg/kg, n=24 at 1 mg/kg and n=23 at 5mg/kg) in  $Ca_v1.3^{-/-}$  animals. Statistics: analysis of variance (ANOVA) followed by Holm-Sidak multiple comparisons test. **B.** PP interval variability before and after injection of 5 mg/kg tertiapin-Q (n=13). Statistics: paired-test. \*p < 0.05, \*\*p < 0.01, \*\*\*\*p < 0.0001. Error bars define the s.e.m..

## SUPPL FIGURE 5

**A**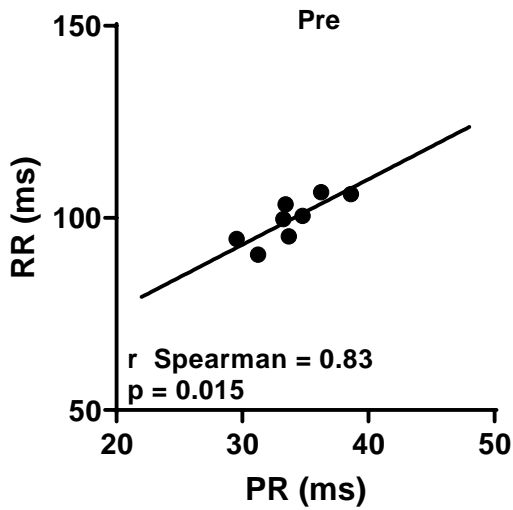**B**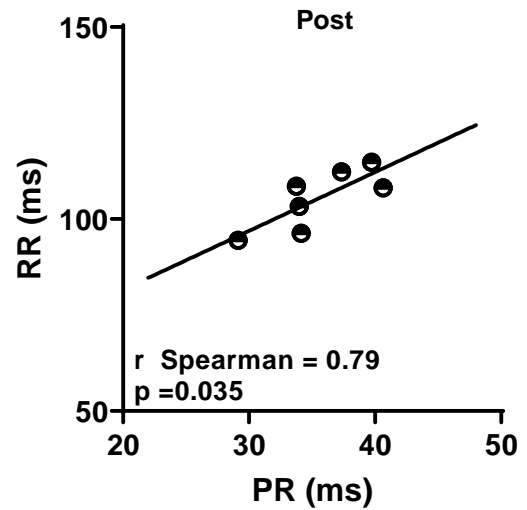**C**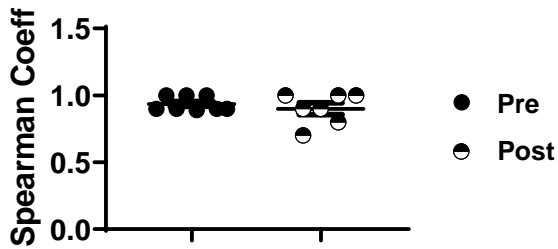

**Supplementary figure 6. Effect of tertiapin-Q on RR-PR intervals correlation in WT animals.**

Dot-plots of RR versus PR interval and relative linear regression lines in control condition (A) and in 5mg/kg tertiapin-Q (B) measured in WT mice (n=8). C: r-Spearman correlation coefficients calculated in control condition (full black circle) and after injection (horizontally black-striped circle) of 5mg/kg tertiapin-Q. Statistics: Mann-Whitney test. Error bars define the s.e.m.

**SUPPL FIGURE 6**

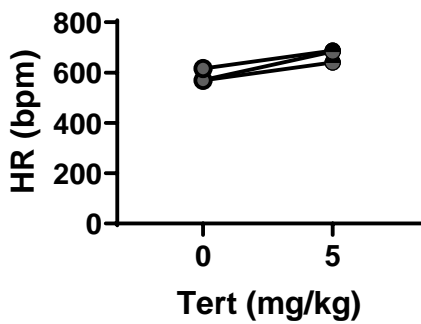

**Supplementary figure 7. Tertiapin-Q effect on heart rate in  $Ca_v3.1^{-/-}$  mice.**

Heart rate measured before (full gray circle) and after (horizontally gray-striped circle) injection of 5mg/kg tertiapin-Q in  $Ca_v3.1^{-/-}$  animals (n=3).

## SUPPL FIGURE 7

**A**

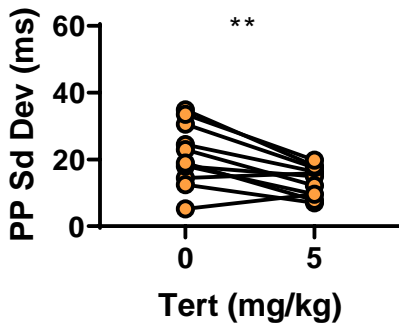

**B**

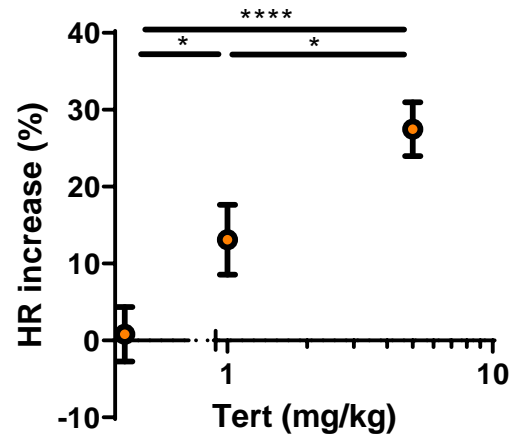

**Supplementary figure 8. A. PP variability before and after 5mg/kg tertiapin-Q injection in  $Ca_v1.3^{-/-}/Ca_v3.1^{-/-}$  mice**

(n=11). Statistics: paired-t-test. B. percentage of increase in the heart rate in response to injection of different doses of tertiapin-Q (n=11 at 0 mg/kg, n=10 at 1 mg/kg and n=11 at 5mg/kg) in double-mutant animals. Statistics: analysis of variance (ANOVA) followed by Holm-Sidak multiple comparisons test. \*p < 0.05, \*\*p < 0.01, \*\*\*\*p < 0.0001. Error bars define the s.e.m..

## SUPPL FIGURE 8

**A**

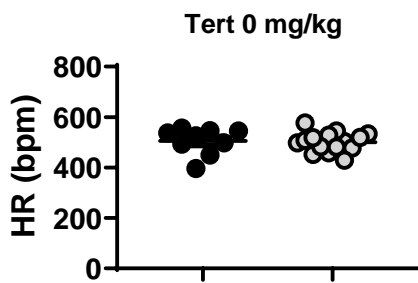

**B**

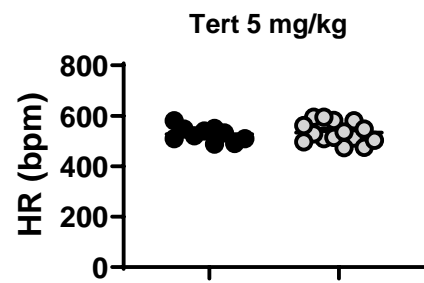

●  $Na_v1.5^{+/+}$  ○  $Na_v1.5^{+/-}$

**Supplementary figure 9. Tertiapin-Q effect on heart rate in  $Na_v1.5^{+/-}$  mice.**

Heart rate measured in 5mg/kg tertiapin-Q and control (NaCl) conditions in  $Na_v1.5$  homozygous (black circle, n=9) and heterozygous (gray circle, n=15) animals. Statistics: unpaired t test. Error bars define the s.e.m.

## SUPPL FIGURE 9

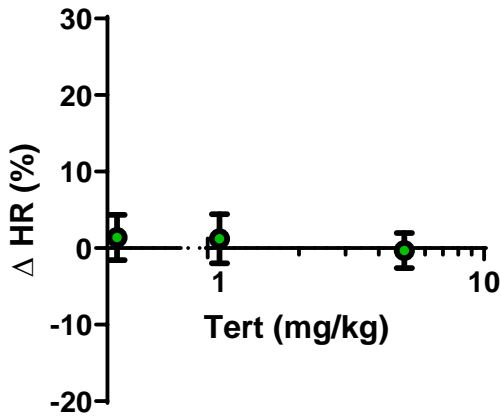

**Supplementary figure 10. Dose response relationship of heart rate in response to tertiapin-Q injection in *Girik4*<sup>-/-</sup> animals.** Percentage of heart rate increasing in mutant *Girik4*<sup>-/-</sup> animals after injection of different doses (n=6 in control condition, n=6 at 1 mg/kg and n=10 at 5 mg/kg) of tertiapin-Q; Statistics: analysis of variance (ANOVA) followed by Holm-Sidak multiple comparisons test. Error bars define the s.e.m.

## SUPPL FIGURE 10

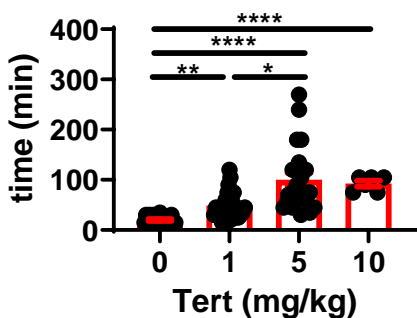

**Supplementary figure 11. Dose response curve of the duration of the 'rescuing' effect on heart rate in response to tertiapin-Q injection in *Ca<sub>v</sub>1.3*<sup>-/-</sup> animals.** Duration of effect on the heart rate after injection of different doses of tertiapin-Q in *Ca<sub>v</sub>1.3*<sup>-/-</sup> mice (n=19 at 0 mg/kg, n=24 at 1 mg/kg, n=23 at 5 mg/kg and n=6 at 10 mg/kg). Statistics: Kruskal-Wallis test followed by multiple comparisons test. \*p < 0.05, \*\*p < 0.01, \*\*\*\*p < 0.0001. Error bars define the s.e.m.

## SUPPL FIGURE 11
